# Supplementary material
Source: PubMed Central journal article supplement (PMC6342279)
Supplement: NIHMS1004758-supplement-Supplemental.pdf [file NIHMS1004758-supplement-Supplemental.pdf]

Screen Targeting Lung and Prostate Cancer Oncogene Identifies Novel Inhibitors of RGS17 and  
Problematic Chemical Substructures

**Corresponding Author:**

David L. Roman

College of Pharmacy, University of Iowa

115 S. Grand Avenue, S327 PHAR

Iowa City, Iowa 52242

Tel: 319-335-6920

Fax: 319-335-8766

David-roman@uiowa.edu

**Table SI: Screening results of NCI NExT Diversity Library**

| <b>NCI library</b>                               | <b>60,502 compounds</b> | <b>hit rate</b> |
|--------------------------------------------------|-------------------------|-----------------|
| <b>initial hits</b>                              | 131 compounds           | 0.22%           |
| <b>non PAINS</b>                                 | 110 compounds           | 0.18%           |
| <b>3 point biotin-GST counter screen</b>         | 36 compounds            | 0.06%           |
| <b>protein-protein interaction dose response</b> | 16 compounds            | 0.03%           |
| <b>biotin-GST dose response (most selective)</b> | 5 compounds             | 0.01%           |

**Table SII - Results of SMARTS RDKit PAINS filtration with explicit hydrogens merged to query filter. Matching (over, equivalent, under, none) are with respect to results by Saubern et al. for the original SLN filters. Filter names are from reference 52. Black, un-bracketed numbers are our results. Red (numbers) represent results by Saubern et al. for RDKit using a 3-pass filtration process. Red [numbers] represent results by Saubern et al. for RDKit, no 3-pass filtration.**

|               | <b>over match</b> | <b>equivalent</b> | <b>under match</b> | <b>no match</b> |
|---------------|-------------------|-------------------|--------------------|-----------------|
| <b>p_m150</b> | 1 (0)             | 11 (4)            | 4 (5)              | 0 (7)           |
| <b>p_l150</b> | 12 (1)            | 27 (14)           | 3 (2)              | 11 (36)         |
| <b>p_l15</b>  | 2 (14)            | 77 (3)            | 1 (1)              | 10 (72)         |
| <b>total</b>  | 15 (15) [7]       | 115 (21) [31]     | 8 (8) [7]          | 21 (115) [115]  |

**Table SIII - Calculated IC<sub>50</sub> values for the curves in Figure S2. Control data not shown. Hits were selected as leads based on RGS17 IC<sub>50</sub> value results. NC = not converged, UC = uncalculable.**

| compound           | RGS17 IC <sub>50</sub> (μM) | control IC <sub>50</sub> (μM) |
|--------------------|-----------------------------|-------------------------------|
| SAM003813654       | 43.7                        | >100                          |
| SAM003765252       | 35.0                        | >100                          |
| SAM003821917       | 46.4                        | >100                          |
| SAM003697649       | 40.6                        | 99.4                          |
| SAM003814748 (IV)  | 31.1                        | NC                            |
| SAM003813578       | 41.8                        | >100                          |
| SAM003823278 (I)   | 9.55                        | >100                          |
| SAM003792154 (II)  | 19.2                        | >100                          |
| SAM003697650       | 44.0                        | >100                          |
| SAM003692151 (V)   | 14.3                        | >100                          |
| SAM003765221       | 48.2                        | >100                          |
| SAM003692405       | 49.7                        | >100                          |
| SAM003692400       | 49.2                        | >100                          |
| SAM003761383       | 39.5                        | NC                            |
| SAM003792514 (III) | 14.4                        | >100                          |
| SAM003692403       | 50.0                        | >100                          |

**Table SIV – IC<sub>50</sub> values calculated for the curves depicted in Figure 3. Values are represented as the 95% CI IC<sub>50</sub> value in μM.**

| compound | initial from library | t = 0 | t = 7 days   | t = 14 days  | t = 28 days  | b-GST control t = 14 days |
|----------|----------------------|-------|--------------|--------------|--------------|---------------------------|
| I        | 4.57 to 17.2         | > 100 | 24.6 to 63.5 | 5.41 to 15.3 | 1.26 to 10.2 | > 100                     |
| IV       | 21.4 to 44.4         | > 100 | 10.6 to 14.7 | 5.22 to 9.87 | 3.50 to 14.9 | > 100                     |
| V        | 9.28 to 21.4         | NC    | 5.06 to 7.55 | 2.07 to 3.76 | 1.83 to 4.89 | > 100                     |

**Table SV – IC<sub>50</sub> values for the curves in Figures 5A, 5B, reported at the 95% CI.**

| <u>compound</u> | <u>IC<sub>50</sub> μM 95% CI</u> |
|-----------------|----------------------------------|
| II              | 12.2 to 29.2                     |
| II-1            | 62.2 to > 100                    |
| II-2            | 40.6 to 97.6                     |
| II-3            | 3.10 to 9.12                     |
| II-4            | NC                               |
| II-5            | NC                               |
| II-6            | > 100                            |
| II-7            | > 100                            |

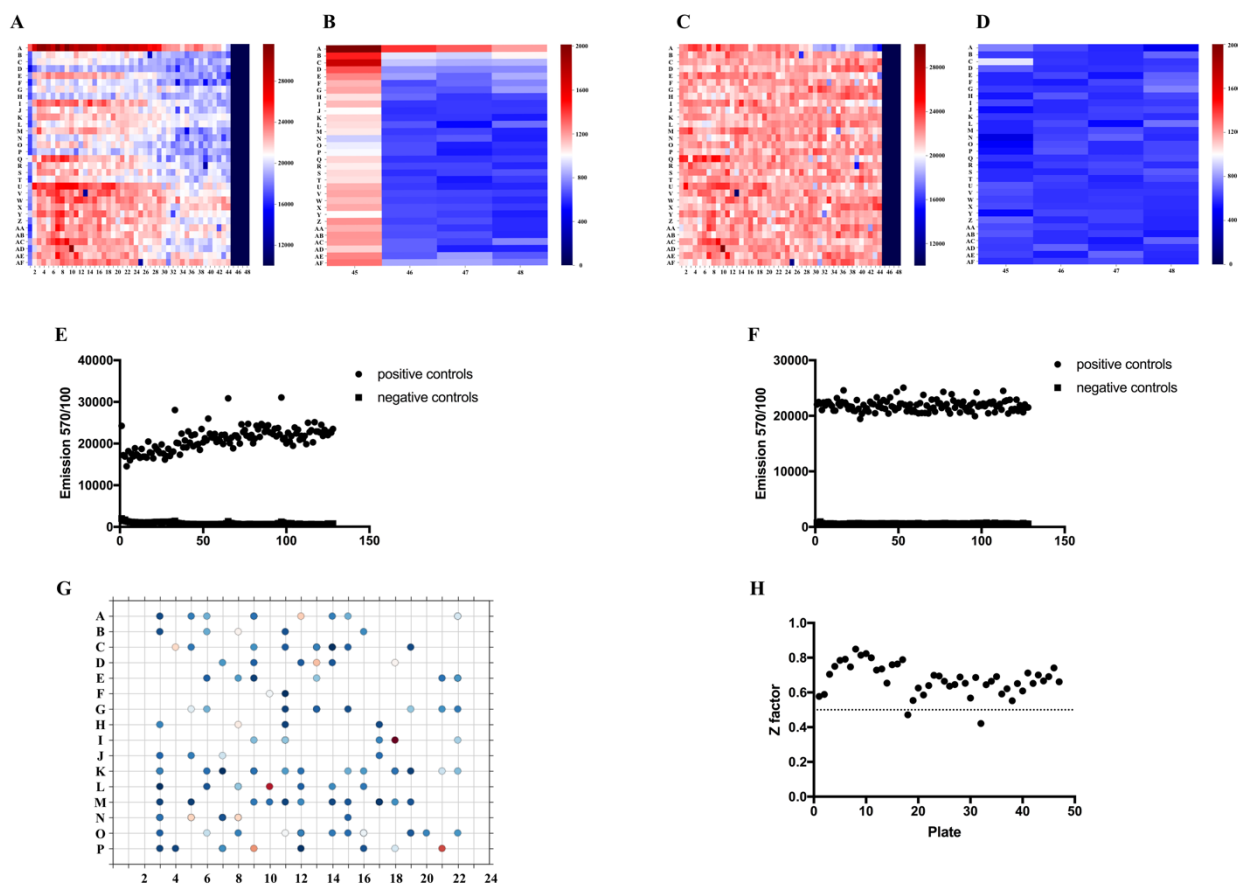

Figure S1 – A/B.) Heatmap of sample screening data for one 1536 well plate, A represents the whole plate where B represents a closer look at the negative control wells. Edge effects and row biases are noted in the uncorrected plate data. C/D.) Same plate data as A and B post B-score analysis, see methods. E.) Positive and negative controls from A. F.) Positive and negative controls of the B-score corrected data from C. G.) Use of B-score correction did not introduce plate bias – hit map of all 131 identified hits show a relatively equal distribution. Hits projected onto a 384 well plate corresponding to the format of the parent plates. H.) Z-factor for each plate in the screen, each containing 128 internal positive and 128 internal negative controls. Z factors are on B-score corrected data.

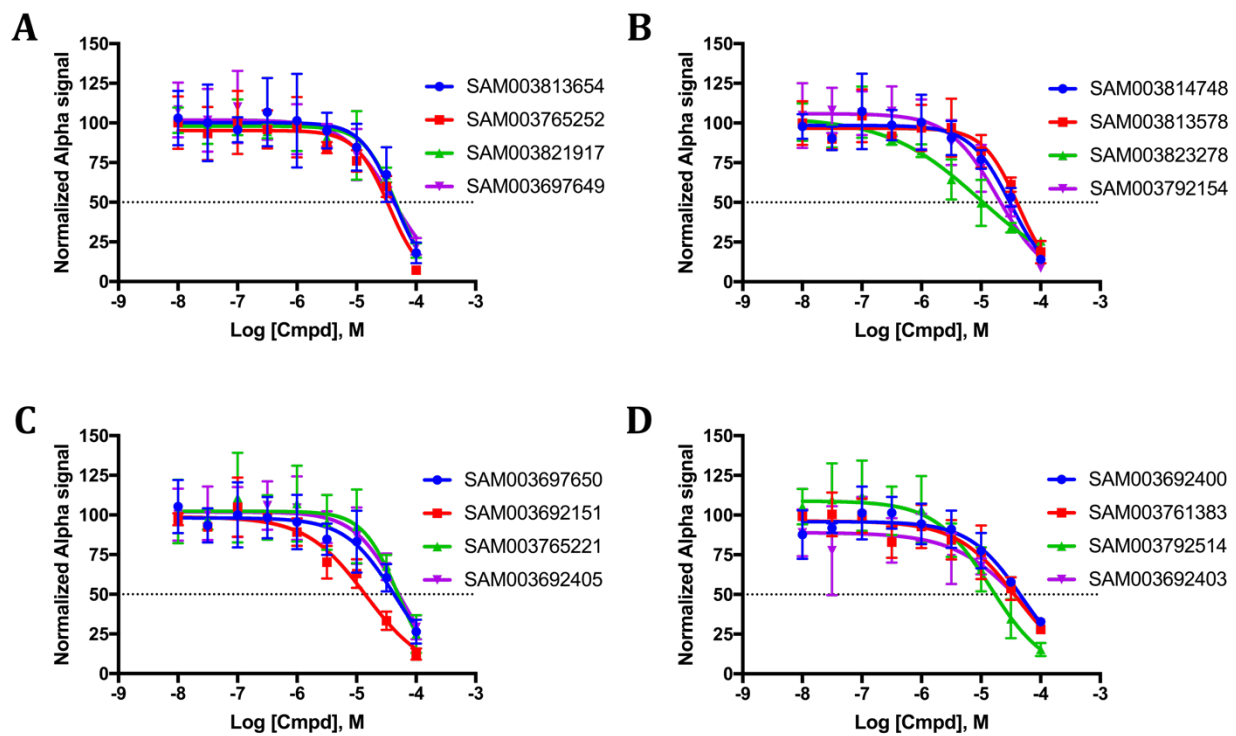

Figure S2 – Dose response analysis of the 16 hit compounds that were tested in  $n=3$ .  $IC_{50}$  values are listed in table SII. Data are  $n=3$  in duplicate shown as mean  $\pm$  SD.

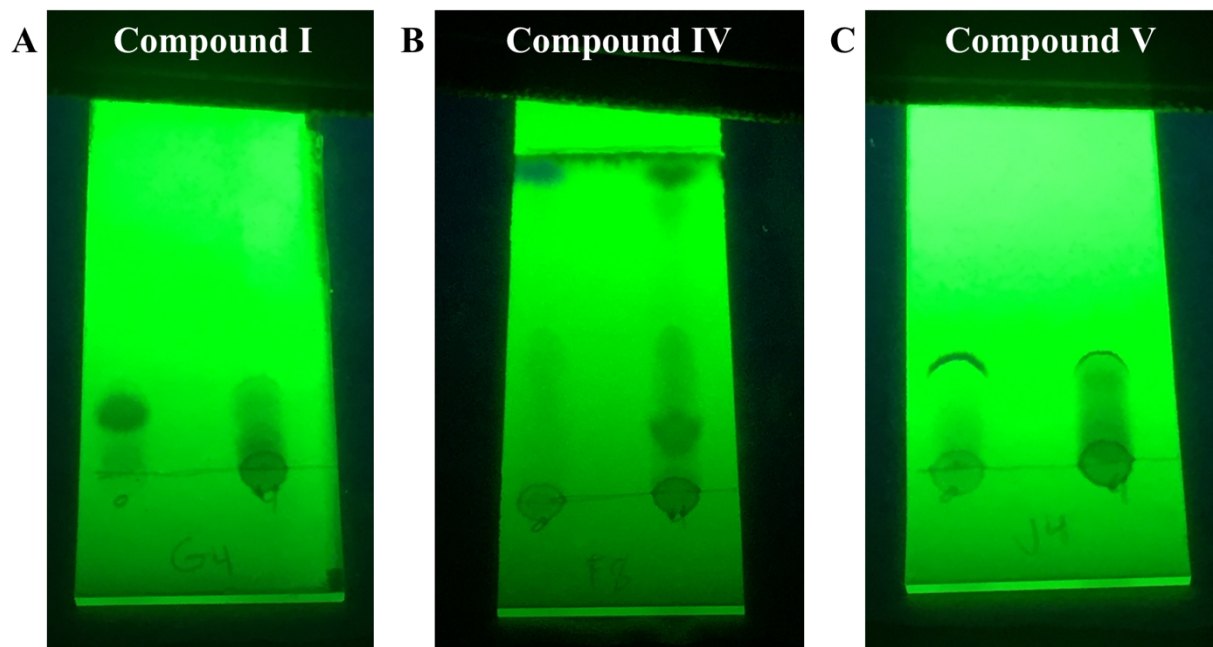

Figure S3 – TLC analysis of lead compounds found to exhibit increased potency when incubated at RT for an extended time. For each image, freshly made compound is at left corresponding to  $t = 0$  data from Figure 3, and  $t = 28$  days product is at right. For each compound,  $t = 28$  days products display a different pattern from  $t = 0$  compound, indicating decomposition of the parent compound.

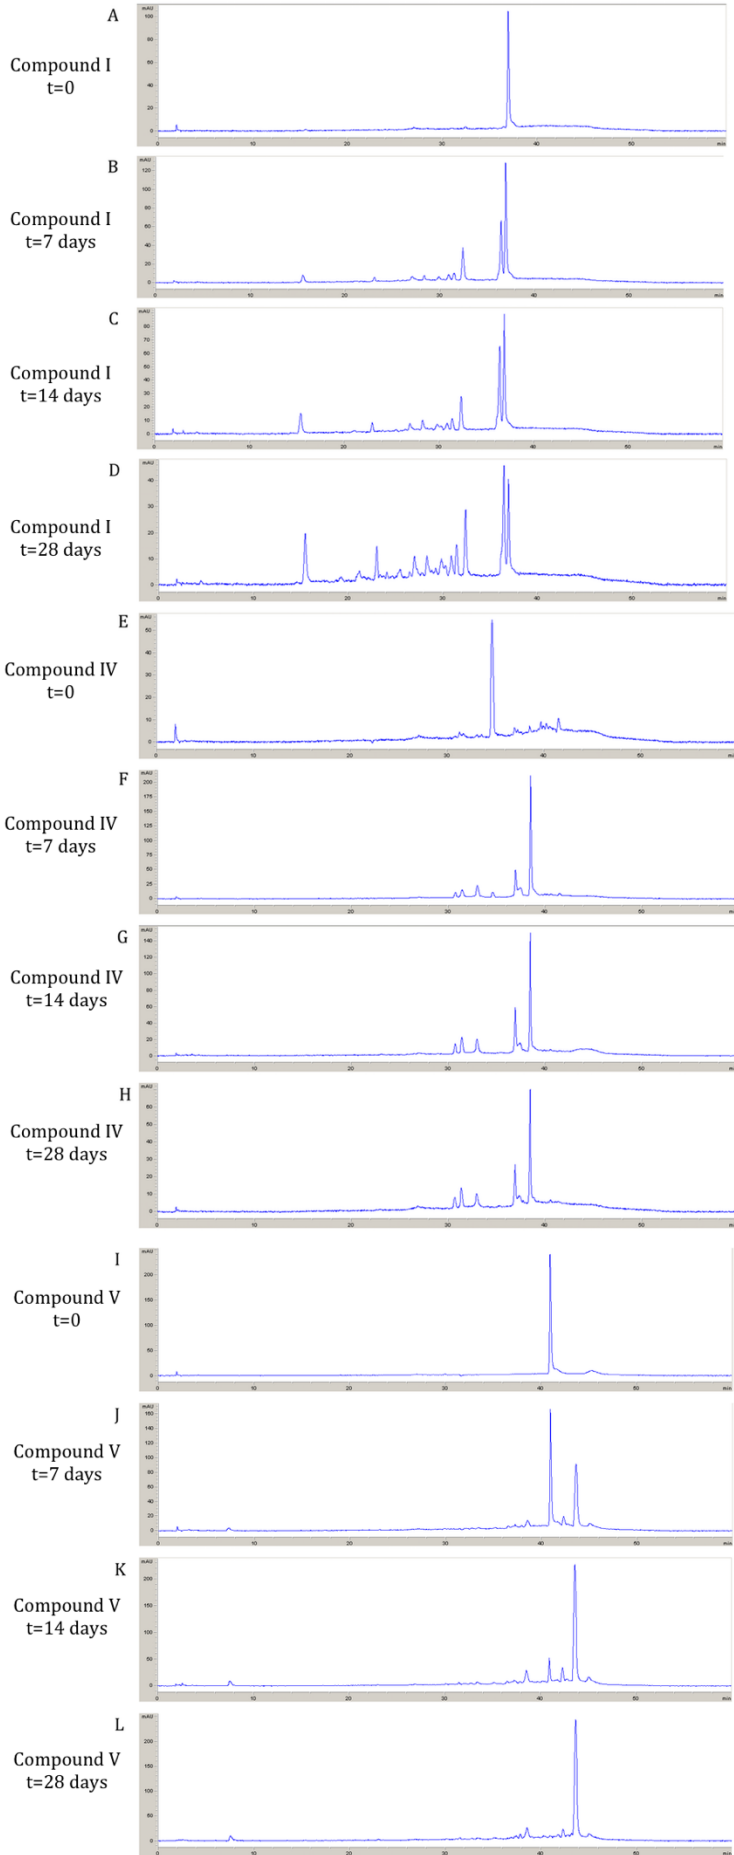



Figure S4 – HPLC analysis of compound I (A-D), IV (E-H), and V (I-L) degradation products.
